# Supplementary material
Source: bioRxiv or medRxiv preprint supplement (https://www.biorxiv.org/highwire/filestream/20857/field_highwire_adjunct_files/1/075556-2.pdf)
Supplement: Supplementary file [file 075556-2.pdf]

## Supplementary Figures and Legends for

### Lipid metabolic perturbation is an early-onset phenotype in adult *spin* mutants: a *Drosophila* model for lysosomal storage disorders

Sarita Hebbar<sup>1#\*</sup>, Avinash Khandelwal<sup>1+</sup>, Jayashree R<sup>2</sup>, Samantha J. Hindle<sup>3^</sup>, Yin Ning Chiang<sup>4</sup>, Joanne Y. Yew<sup>5</sup>, Sean T. Sweeney<sup>3</sup>, and Dominik Schwudke<sup>1\*§</sup>

<sup>1</sup>: National Center For Biological Sciences, Tata Institute For Fundamental Research, Bangalore, India 560065

<sup>2</sup>: c-CAMP, Proteomics Facility, NCBS

<sup>3</sup>: Department of Biology, University of York, York

<sup>4</sup>: Temasek Life Sciences Laboratory, Singapore

<sup>5</sup>: Pacific Biosciences Research Center, University of Hawai‘i at Mānoa, 1993 East-West Road, Honolulu, HI 96822

\*Equal contribution as corresponding authors: [hebbar@mpi-cbg.de](mailto:hebbar@mpi-cbg.de) and [dschwudke@fz-borstel.de](mailto:dschwudke@fz-borstel.de)

Present Address:

<sup>#</sup>: Max Planck Institute for Molecular Cell Biology and Genetics, Dresden 01277

<sup>+</sup>: EMBL/CRG Systems Biology Research Unit, Centre for Genomic Regulation (CRG), Dr. Aiguader 88, 08003 Barcelona, Spain & Universitat Pompeu Fabra (UPF), Barcelona, Spain.

<sup>§</sup>: Research Center Borstel, Borstel, 23845, Germany

<sup>^</sup>: Department of Anesthesia and Perioperative Care, Genentech Hall, 600 16<sup>th</sup> Street, University of California San Francisco, San Francisco, CA.

### Supplemental Figure S1:

#### Decreased adult lifespan in *spin* mutants

Survival plot comprises line graphs generated using percentage of surviving adults over time at 25°C for *spin* mutants (green lines) and in a rescue condition (purple) in relation to their genetic controls (black). This data comes from multiple sets of 15 flies constituting a sample size of at least 50-100 flies. For *spin*<sup>4</sup>/*spin*<sup>5</sup> the population size is below 50 because of the inability to obtain large number of escaper adults. Legend displays the genotypes and T<sup>50</sup> values in parenthesis

#### Survival Plot (at 25 °C)

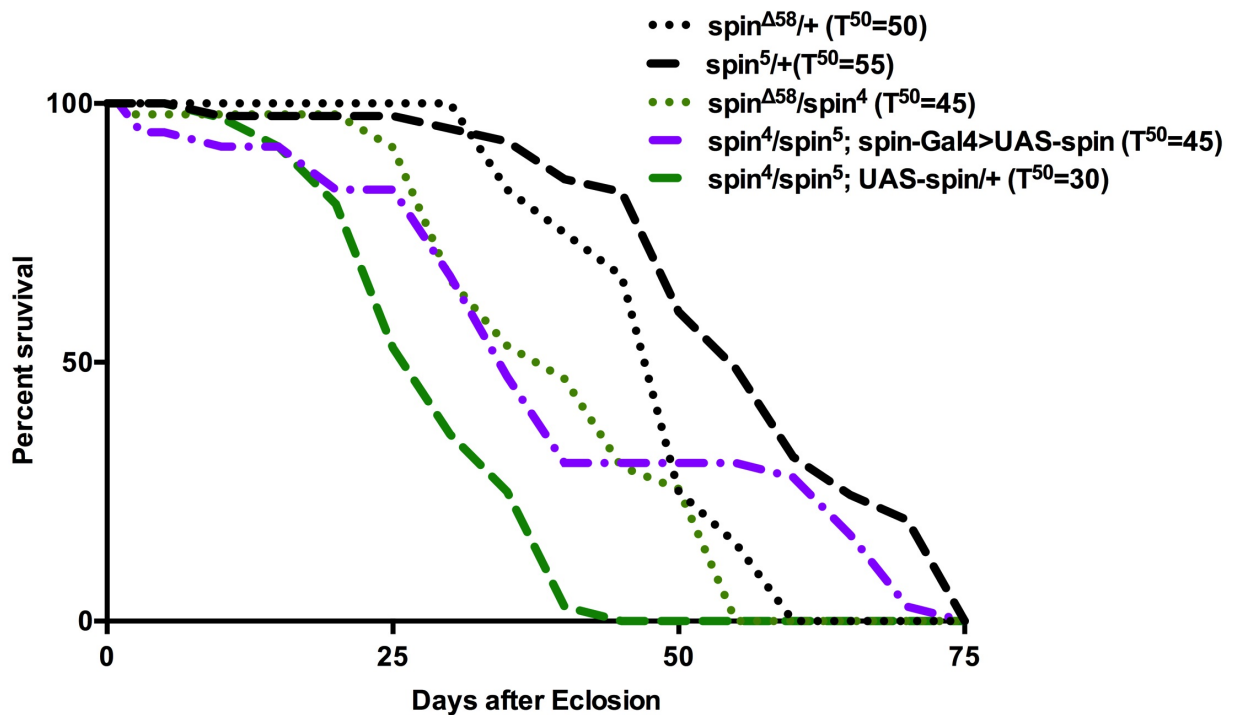

**Supplemental Figure S2: Strategy for characterization of interactors of spin using LC-MS.**

Adult flies overexpressing Spin-GFP (*spin-Gal4>spin-GFP*; fluorescent and corresponding bright-field image) were used for protein extraction. As a control we also used protein extracts from flies overexpressing only GFP (*spin-Gal4>GFP*). A pull-down was achieved using a GFP antibody. The initial lysate, flow-through following the binding, and final eluent (Co-IP) were run on a SDS\_PAGE gel. Images from two independent experiments for each (*spin-Gal4>spin-GFP* and *spin-Gal4>GFP*) are presented here. These were subjected to routine in-gel-digestion followed by LC-MS workflow as described in methods. Schematic Venn Diagram highlights subset of proteins that are specific interactors of Spin-GFP (black dotted

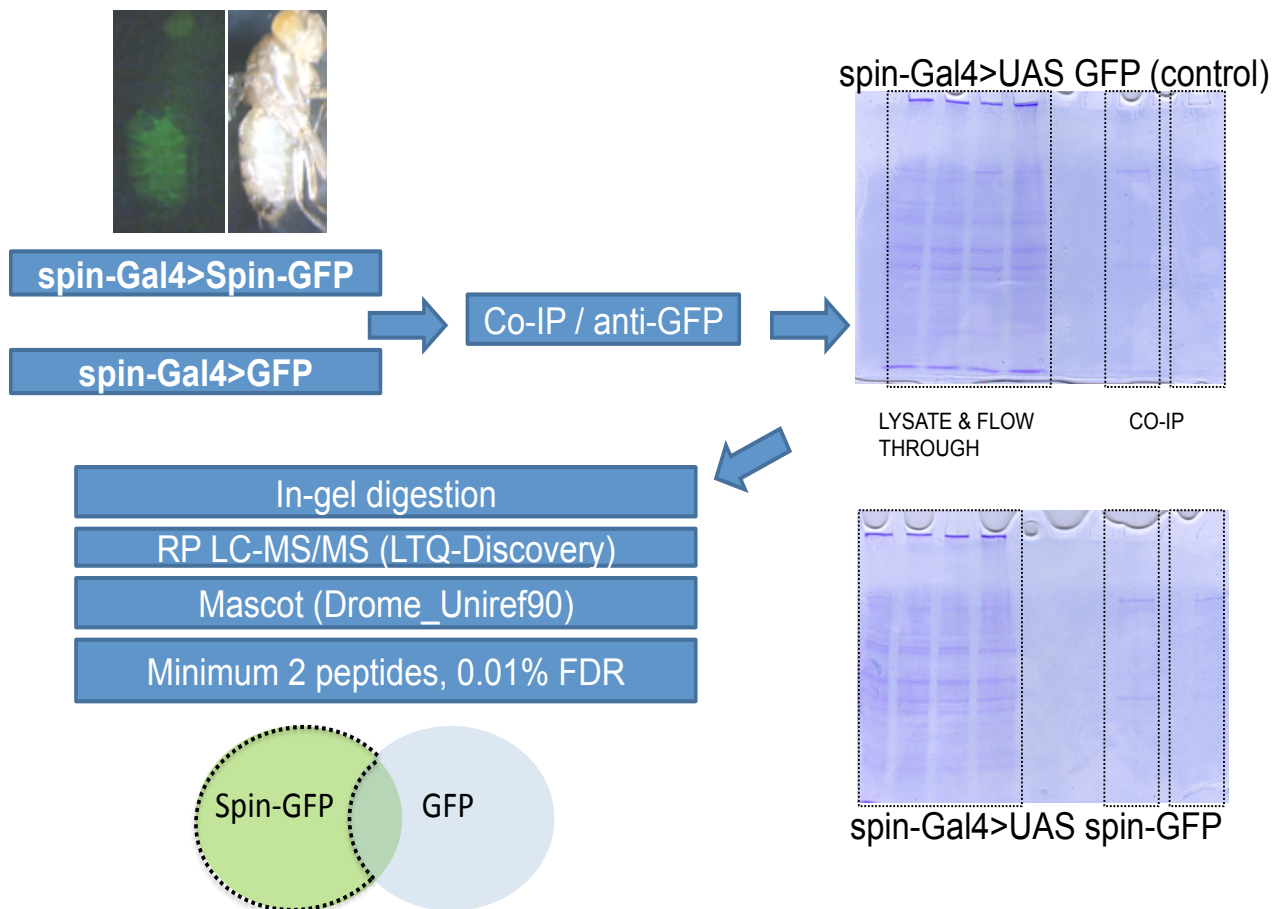

outline), i.e. not common to the GFP control pull-down are presented in Table 1.

### Supplemental Figure S3: Abdominal body wall staining in *spin* mutants

A: Oenocytes Identification: Representative images from dissected adult abdominal fillets of females of

A': Oenocyte driver (*promE (800)- Gal4*; Billeter et al., 2009) driving nuclear GFP (Green). Oenocytes that are located dorsally and ventrally located are clearly evident. Ventral mid-line is indicated with a dashed line. The fat bodies (blue) are stained with Lipid droplet dye, LD450 (Spandl et al, 2009).

A'': *spin-Gal4* rescue in *spin* mutants clearly shows the rescue construct (*UAS spin-GFP*; green) is expressed abundantly in oenocytes (green). The musculature is labeled with Phalloidin tagged Alexa-Fluor 568 (shown in magenta)

B: Examples of different adult abdominal fillets for mutants (*spin<sup>4</sup>/spin<sup>5</sup>*) and rescue (*spin<sup>4</sup>/spin<sup>5</sup>; spin-Gal4>UAS spin*) stained with LPP antibody showing fat-body and oenocyte staining.

#### A. Rescue with *spin-Gal4* drives expression in Oenocytes

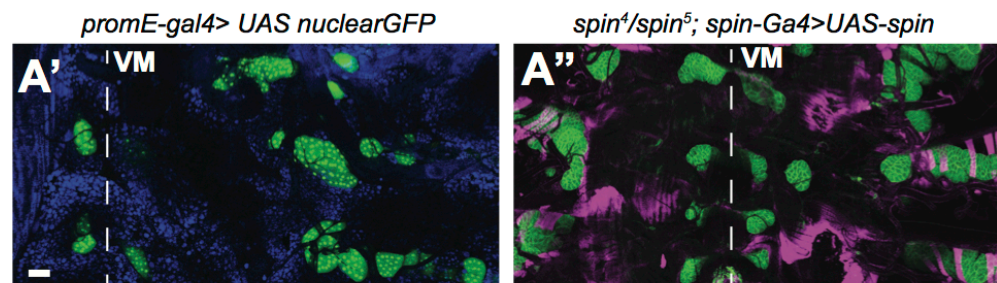

#### B. Decreased Lpp immunostaining in *spin* mutants

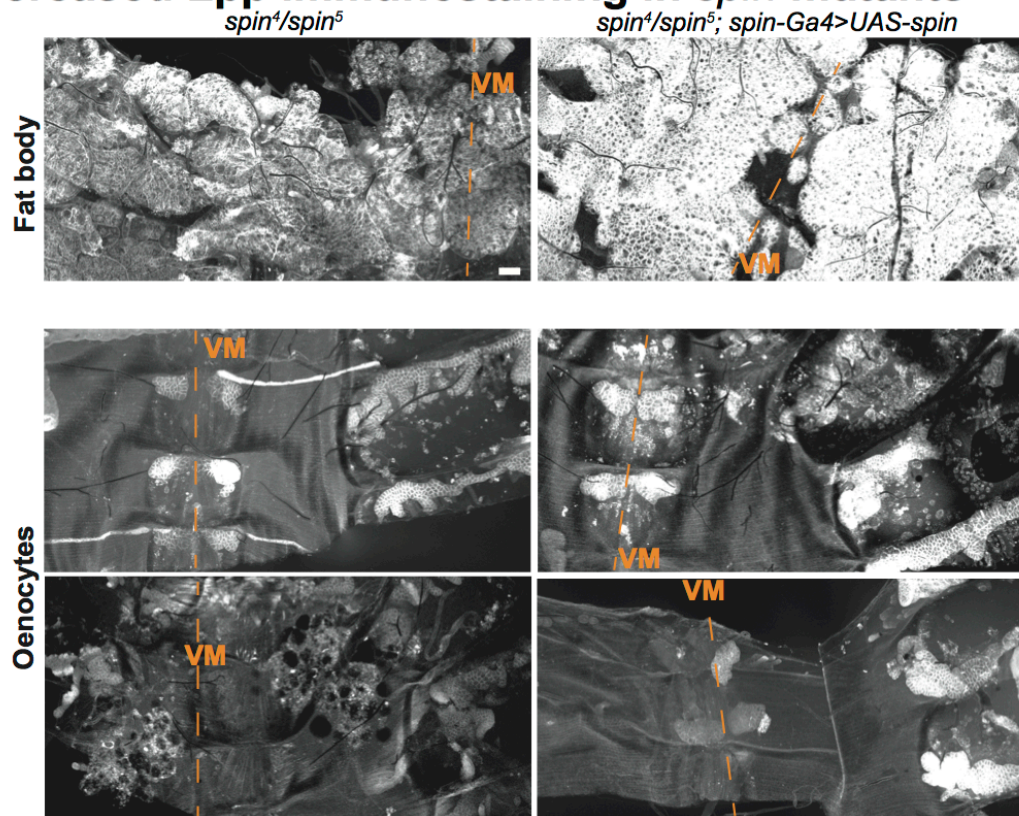

**Suppl Table 1: Genotypes used in this study**

| <b>Genotype</b>                                                                                                              | <b>Achieved genetic perturbation</b>                                                                                                            |
|------------------------------------------------------------------------------------------------------------------------------|-------------------------------------------------------------------------------------------------------------------------------------------------|
| +/+; <i>spin</i> <sup>4</sup> / <i>spin</i> <sup>5</sup> ;+                                                                  | <i>spin</i> mutant heteroallelic combination /transheterozygote (Sweeney and Davis, 2002) constituting a genetic null.                          |
| +/+; <i>spin</i> <sup>4</sup> / <i>spin</i> <sup>A58</sup> ;+                                                                | <i>spin</i> mutant heteroallelic combination /transheterozygote (Milton et al., 2011; Sweeney and Davis, 2002) constituting a genetic hypomorph |
| +/+; <i>spin</i> <sup>5</sup> / <i>spin</i> <sup>A58</sup> ;+                                                                | <i>spin</i> mutant heteroallelic combination /transheterozygote (Milton et al., 2011; Sweeney and Davis, 2002) constituting a genetic hypomorph |
| +/+; <i>spin</i> <sup>4</sup> / <i>spin</i> <sup>5</sup> ; <i>spin</i> -<br><i>Gal4</i> > <i>UAS spin</i> -<br><i>GFP</i> ;+ | Rescue of <i>spin</i> levels in a transheterozygote in endogenous <i>spin</i> producing cells (Sweeney and Davis, 2002)                         |
| +/+; UAS <i>spin</i> -<br><i>GFP</i> /+; <i>spin</i> - <i>Gal4</i> /+                                                        | Expression of <i>spin</i> -tagged GFP in endogenous <i>spin</i> producing cells (Sweeney and Davis, 2002)                                       |
| +/+; <i>spin</i> <sup>4</sup> / <i>spin</i> <sup>5</sup> ; UAS<br><i>spin</i> - <i>GFP</i> /+                                | <i>spin</i> mutant background for overexpression experiments                                                                                    |
| +/+; <i>spin</i> <sup>4</sup> / <i>spin</i> <sup>5</sup> ; <i>spin</i> -<br><i>Gal4</i> > <i>UAS slab</i>                    | <i>spin</i> mutant and an overexpression of <i>slab</i> (Rohrbough et al., 2004)                                                                |
| +/+; <i>spin</i> <sup>4</sup> / <i>spin</i> <sup>5</sup> ;<br><i>slab</i> <sup>2</sup> /+                                    | <i>spin</i> mutant and <i>slab</i> <sup>2</sup> heterozygosity (Rohrbough et al., 2004)                                                         |

### Supplemental Table 2: Details for Internal Standard (IS) mix used:

#### I. IS composition (for single brain analyses; corresponding to Fig. 2)

| Lipid Standard | Amount (picomoles) |
|----------------|--------------------|
| Cer_35:1       | 11.62              |
| PC_31:1        | 9.88               |
| PE_31:1        | 9.56               |
| PE-OO          | 11.98              |
| PI_31:1        | 8.32               |
| TAG_51:0       | 13.88              |
| CerPE_29:1     | 11.12              |
| TOTAL          | 76.36              |

#### II. IS composition (for pooled brain extracts; corresponding to Fig. 3/4)

| Lipid Standard                  | Amount (picomoles) |
|---------------------------------|--------------------|
| CerPE-C12 Sphingosyl PE [d17:1] | 7.97               |
| PC [17:0-14:1]                  | 4.43               |
| PE [17:1-14:0]                  | 4.29               |
| C17-Cer [d18:1/17:0]            | 10.41              |
| PE-OO [40:00]                   | 7.16               |
| Sphingosine [d17:1]             | 7.1                |
| PI [17:0-14:1]                  | 3.72               |
| GluCer[d18:1/12:0]              | 7.89               |
| PS [17:0-14:1]                  | 2.95               |
| TOTAL                           | 55.92              |
